# Supplementary material
Source: PubMed Central journal article supplement (PMC2751956)
Supplement: tpc.108.064964_1.pdf [file tpc.108.064964_1.pdf]

Supplemental Data. Pesaresi et al. (2009). *Arabidopsis* STN7 Kinase Provides a Link Between Short- and Long-Term Photosynthetic Acclimation.

Additional, extensive Supplemental Tables can be found in a second Supplemental Data file entitled “Supplemental Tables 3\_4\_5\_6\_7\_9”

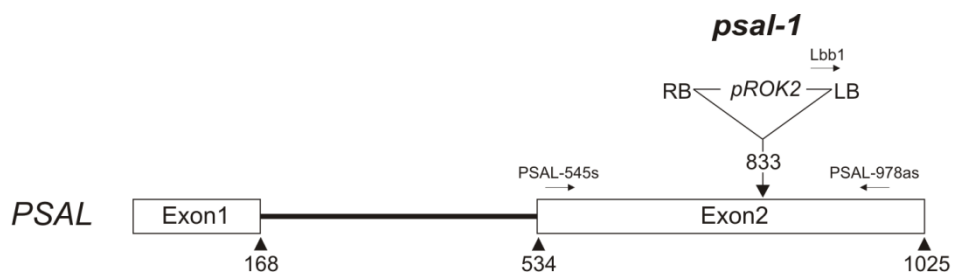

**Supplemental Figure 1.** Tagging of the *PSAL* gene (*At4g12800*) coding for the PSI subunit L.

In *psal-1*, the *PSAL* gene is disrupted by an insertion of the pROK2 T-DNA in the second exon. The orientation of primers used for PCR-based genotyping and segregation analysis (LBb1: 5'-GCGTGGACCGCTTGCTGCAACTC-3'; PSAL-545s: 5'-AGTAGTTCAACCAATCAACGGTG-3'; PSAL-978as: 5'-AGAACGTAGAGAAGGAAGTAAGC-3') is indicated. The LBb1/PSAL-978as and PSAL-545s/PSAL-978as primer combinations were used to amplify the mutant and WT alleles, respectively. Note that the T-DNA insertion and the arrows indicating the primers are not drawn to scale.

**A**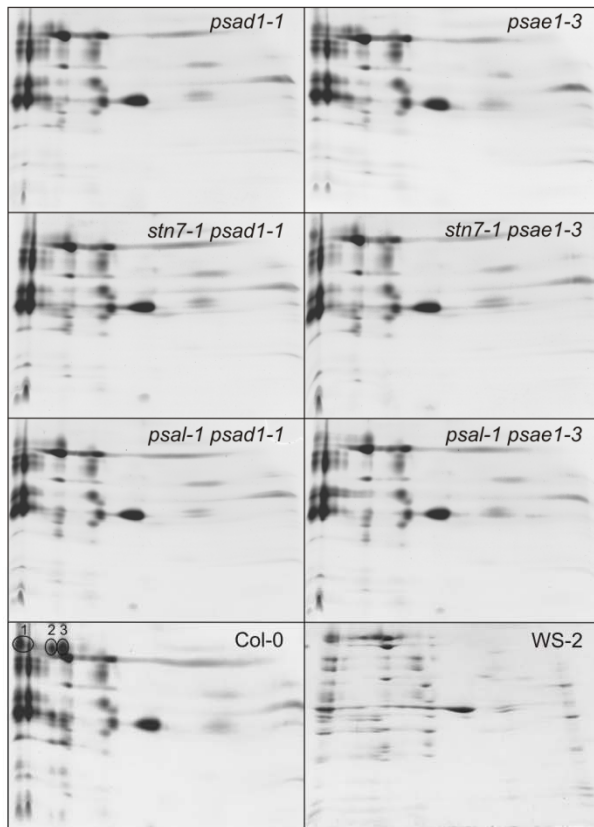**B**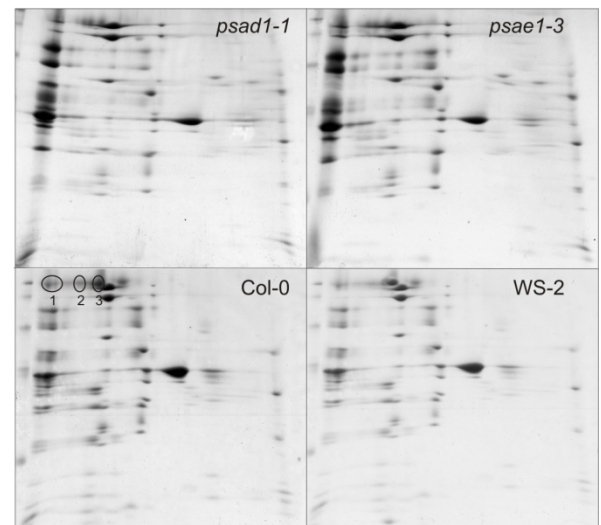

**Supplemental Figure 2.** Quantification of the PSI-LHCI-LHCII complex in WT (Col-0 and WS-2) and mutant plants adapted to state 2 (low light) or state 1 (high light) conditions.

(A) 2D-PAGEs, as in Figure 2, of thylakoid membranes isolated from Col-0, WS-2 and mutant (*psad1-1*, *stn7-1 psad1-1*, *psal-1 psad1*, *psae1-3*, *stn7-1 psae1-3*, *psal-1 psae1-3*) leaves adapted to state 2, stained with Coomassie.

(B) The BN-gel high-light (state 1) lanes from Col-0, WS-2, *psad1-1* and *psae1-3* in Figure 4B were subjected to denaturing PAGE, and the 2-D gels were stained with Coomassie.

**Supplemental Table 1.** List of proteins identified within the 670 kDa pigment protein complex (observable in BN-PAGE; see also Figures 2 and 3) by mass-spectrometry (see Methods). Note that only proteins identified by at least 4 peptides are reported.

| Gene      | Description                               |
|-----------|-------------------------------------------|
| psaA      | PSI P700 apoprotein A1                    |
| psaB      | PSI P700 apoprotein A2                    |
| psaC      | PSI C protein                             |
| psaJ      | PSI J protein                             |
| AT1G03130 | PSI reaction center subunit II (PsaD1)    |
| AT1G31330 | PSI subunit III (PsaF)                    |
| AT1G52230 | PSI subunit VI (PsaH2)                    |
| AT1G55670 | PSI subunit V (PsaG)                      |
| AT1G61520 | Chlorophyll a/b binding protein (LHCA3)   |
| AT2G20260 | PSI reaction center subunit IV (PsaE2)    |
| AT3G16140 | PSI subunit VI (PsaH1)                    |
| AT3G47470 | Chlorophyll a/b binding protein (LHCA4)   |
| AT3G54890 | Chlorophyll a/b binding protein (LHCA1)   |
| AT3G61470 | Chlorophyll a/b binding protein (LHCA2)   |
| AT4G12800 | PSI subunit XI (PsaL)                     |
| AT4G28750 | PSI subunit IV (PsaE1)                    |
| AT5G64040 | PSI subunit (PsaN)                        |
| AT1G29910 | Chlorophyll a/b binding protein (LHCB1.2) |
| AT1G29930 | Chlorophyll a/b binding protein (LHCB1.3) |
| AT2G05070 | Chlorophyll a/b binding protein (LHCB2.2) |
| AT2G34420 | Chlorophyll a/b binding protein (LHCB1.5) |
| AT2G34430 | Chlorophyll a/b binding protein (LHCB1.4) |

**Supplemental Table 2.** Parameters of photosynthetic electron flow based on chlorophyll fluorescence measurements of mutant and wild-type plants.

|                         | $F_V/F_M$       | $\Phi_{II}$     | 1-qP            | $J_F$           |
|-------------------------|-----------------|-----------------|-----------------|-----------------|
| Col-0                   | $0.82 \pm 0.01$ | $0.76 \pm 0.01$ | $0.04 \pm 0.01$ | $14.06 \pm 0.3$ |
| WS                      | $0.82 \pm 0.01$ | $0.76 \pm 0.01$ | $0.04 \pm 0.01$ | $14.06 \pm 0.2$ |
| <i>TSP9</i> RNAi        | $0.81 \pm 0.02$ | $0.75 \pm 0.02$ | $0.05 \pm 0.01$ | $13.87 \pm 0.3$ |
| <i>chaos</i>            | $0.82 \pm 0.02$ | $0.77 \pm 0.03$ | $0.03 \pm 0.00$ | $10.68 \pm 0.4$ |
| <i>asLhcb2.1</i>        | $0.80 \pm 0.01$ | $0.77 \pm 0.02$ | $0.03 \pm 0.00$ | $11.39 \pm 0.3$ |
| <i>stn7-1</i>           | $0.82 \pm 0.01$ | $0.75 \pm 0.01$ | $0.07 \pm 0.01$ | $13.87 \pm 0.4$ |
| <i>stn8-1</i>           | $0.82 \pm 0.01$ | $0.76 \pm 0.01$ | $0.04 \pm 0.00$ | $14.06 \pm 0.2$ |
| <i>psal-1</i>           | $0.83 \pm 0.01$ | $0.72 \pm 0.01$ | $0.10 \pm 0.01$ | $13.32 \pm 0.2$ |
| <i>pete2-1</i>          | $0.82 \pm 0.01$ | $0.68 \pm 0.01$ | $0.11 \pm 0.02$ | $12.58 \pm 0.3$ |
| <i>psae1-3</i>          | $0.79 \pm 0.00$ | $0.49 \pm 0.02$ | $0.39 \pm 0.03$ | $9.06 \pm 0.2$  |
| <i>psad1-1</i>          | $0.78 \pm 0.01$ | $0.46 \pm 0.03$ | $0.42 \pm 0.02$ | $8.51 \pm 0.3$  |
| <i>stn7-1 pete2-1.1</i> | $0.81 \pm 0.00$ | $0.51 \pm 0.01$ | $0.27 \pm 0.03$ | $9.43 \pm 0.2$  |
| <i>stn7-1 psad1-1</i>   | $0.78 \pm 0.00$ | $0.31 \pm 0.01$ | $0.57 \pm 0.05$ | $5.73 \pm 0.3$  |
| <i>stn7-1 psae1-3</i>   | $0.78 \pm 0.01$ | $0.32 \pm 0.01$ | $0.59 \pm 0.02$ | $5.92 \pm 0.1$  |
| <i>psal-1 pete2-1.1</i> | $0.82 \pm 0.01$ | $0.62 \pm 0.02$ | $0.18 \pm 0.01$ | $11.47 \pm 0.4$ |
| <i>psal-1 psad1-1</i>   | $0.77 \pm 0.00$ | $0.35 \pm 0.01$ | $0.55 \pm 0.02$ | $6.47 \pm 0.3$  |
| <i>psal-1 psae1-3</i>   | $0.78 \pm 0.01$ | $0.39 \pm 0.02$ | $0.48 \pm 0.05$ | $7.21 \pm 0.2$  |
| <i>stn8-1 pete2-1.1</i> | $0.82 \pm 0.00$ | $0.68 \pm 0.01$ | $0.10 \pm 0.01$ | $12.58 \pm 0.3$ |
| <i>stn8-1 psad1-1</i>   | $0.78 \pm 0.01$ | $0.47 \pm 0.02$ | $0.39 \pm 0.03$ | $7.21 \pm 0.2$  |
| <i>stn8-1 psae1-3</i>   | $0.79 \pm 0.00$ | $0.48 \pm 0.02$ | $0.38 \pm 0.03$ | $8.88 \pm 0.3$  |

Measurements were performed as described in the Methods section. Mean values for five plants ( $\pm$ SD) are shown. The *in vivo* electron transport rate ( $J_F$ ,  $\mu\text{mol electrons m}^{-2} \text{s}^{-1}$ ) was derived from chlorophyll fluorescence measurements at an actinic light intensity of  $37 \mu\text{mol photons m}^{-2} \text{s}^{-1}$ .

**Supplemental Table 8.** Real-time PCR analysis of exemplary genes differentially regulated in the *stn7-1*, *psad1-1*, *stn7-1 psad1-1*, *psae1-3* and *stn7-1 psae1-3* mutants.

| Gene      | <i>stn7-1</i>     | <i>psad1-1</i>     | <i>psae1-3</i>    | <i>stn7-1 psad1-1</i> | <i>stn7-1 psae1-3</i> |
|-----------|-------------------|--------------------|-------------------|-----------------------|-----------------------|
| At3g12580 | 0.25±0.010 (0.29) | 0.12±0.001 (0.06)  | 0.35±0.026 (0.33) | 0.22±0.013 (0.07)     | 0.52±0.028 (0.36)     |
| At3g16360 | 0.35±0.003 (0.18) | 0.05±0.006 (0.05)  | 0.17±0.028 (0.25) | 0.01±0.001 (0.05)     | 0.01±0.003 (0.53)     |
| At5g54060 | 0.15±0.010 (0.20) | 0.24±0.003 (0.25)  | 0.43±0.090 (0.32) | 0.25±0.040 (0.30)     | 0.25±0.036 (0.25)     |
| At3g62950 | 1.55±0.164 (2.23) | 4.49±0.060 (15.20) | 4.17±0.435 (6.09) | 2.31±0.240 (9.42)     | 6.49±0.481 (4.17)     |
| At1g17745 | 0.73±0.085 (0.40) | 0.10±0.027 (0.23)  | 0.29±0.126 (0.28) | 0.15±0.011 (0.14)     | 0.06±0.013 (0.43)     |

Wild type (Col-O and WS-2) and the different mutant plants were grown for 4 weeks in white light (100  $\mu\text{mol quanta m}^{-2} \text{s}^{-1}$ ) in a 12 h / 12 h light / dark cycle. Expression values of *HSP70* (At3g12580), *HP4* (At3g16360), *UF3GT* (At5g54060), *GRXC11* (At3g62950) and *PGDH* (At1g17745) genes are reported as fold changes  $\pm$  SD in mutants with respect to the corresponding WT plants. Gene expression values obtained by Affymetrix GeneChip analysis are reported in parenthesis.
